# Supplementary material for: CCL4 Functions as a Biomarker of Type 2 Airway Inflammation
Source: MDPI journal article supplement (doi:10.3390/biomedicines10081779), 2022-07-23
Supplement: s1 [file s1]

**Table S1.** Amplification primers (5'–3')

| gene          | forward                             | reverse                             |
|---------------|-------------------------------------|-------------------------------------|
| <i>TSLP</i>   | CCG CCT ATG AGC AGC CAC             | CCT CAG TAG CAT TTA TCT CAG         |
| <i>IL-25</i>  | GAG ATA TGA GTT GGA CAG AGA CTT GAA | CCA TGT GGG AGC CTG TCT GTA         |
| <i>IL-33</i>  | GAA GAA CAC AGC AAG CAA AGC         | TAC CAA AGG CAA AGC ACT CC          |
| <i>CCL4</i>   | CTC CTC ATG CTA GTA GCT GCC TTC     | GGT GTA AGA AAA GCA GCA GGC GGT     |
| <i>CCL5</i>   | GTT GCA CCA AGC TAT GCA GGT         | GCA GAA GCG TTT GGC AAT GT          |
| <i>CCL11</i>  | CCA CAC TGA AGG TCT CCG CA          | TCT CTA GTC GCT GAA GGG GT          |
| <i>CCL26</i>  | ACT CCG AAA CAA TTG TGA CTC AGC TG  | GTA ACT CTG GGA GGA AAC ACC CTC TCC |
| <i>TSLPR</i>  | ATA CTC CAG GAC CAA CCT GAC         | ACA CGT CAC CGT CAC TGC ATC         |
| <i>TLR3</i>   | GGA TAG CTC TCC TTC ACC ATT C       | GAC CCT CCA ACA TGT CAT CAT         |
| <i>CCR5</i>   | CCC AGT GCA CAC AAG TGT AGG TAT C   | GCT CAA GGC AGC TTA TTT CCA A       |
| <i>ICAM-1</i> | CTG CAG ACA GTG ACC ATC             | GTC CAG TTT CCC GGA CAA             |
| <i>GAPDH</i>  | TTC ACC ACC ATG GAG AAG GC          | AGG AGG CAT TGC TGA TGA TCT         |

**Table S2.** Characteristics of patients treated with dupilumab (n=19)

|                                                |                       |                                   |             |
|------------------------------------------------|-----------------------|-----------------------------------|-------------|
| Age (years)                                    | 55.2 ± 14.9           | FENO (ppb)                        | 70.5 ± 44.7 |
| Gender (M/F)                                   | 11/8                  | Lund-Mackay scale                 | 14.5 ± 5.9  |
| Body Mass Index (kg/m <sup>2</sup> )           | 22.4 ± 3.3            | Polyp score                       | 4.9 ± 2.3   |
| NSAID intolerance                              | 7                     | JESREC score                      | 15.9 ± 1.0  |
| Smoking status (never/ex)                      | 14/5                  | FEV <sub>1</sub> (%predicted)     | 83.2 ± 19.8 |
| ESS history (Y/N)                              | 17/2                  | FEF <sub>25-75</sub> (%predicted) | 57.5 ± 38.0 |
| Total IgE (IU/mL)                              | 741 ± 797             | FVC (%predicted)                  | 96.3 ± 10.8 |
| Positive RAST (none/single/multi)              | 5/3/11                | Asthma exacerbation (per year)*   | 1.2 ± 1.8   |
| Eosinophils (/μL) [peak value]                 | 446 ± 369 [895 ± 528] |                                   |             |
| Treatment                                      |                       |                                   |             |
| Inhaled corticosteroids (μg)**                 | 1047 ± 176            | Anti-histamine                    | 11          |
| Long-acting β <sub>2</sub> -adrenergic agonist | 19                    | Inhaled nasal corticosteroids     | 14          |
| Long-acting muscarinic antagonist              | 8                     | Oral corticosteroids              | 1           |
| Leukotriene receptor antagonist                | 12                    | Low-dose macrolide                | 2           |

ESS: endoscopic sinus surgery; FENO = fractionated exhaled nitrogen oxide; FEF<sub>25-75</sub>: forced expiratory flow between 25% and 75% of vital capacity; FEV<sub>1</sub>: forced expiratory volume in 1 second; FVC: forced vital capacity; JESREC: Japanese Epidemiological Survey of Refractory Eosinophilic Chronic Rhinosinusitis. \*A clinically significant exacerbation defined as any worsening of asthma considered by the treating physician to require systemic corticosteroids. \*\* Equivalent doses of fluticasone propionate. Values are number of subjects and mean ± standard deviation.
